# Supplementary material for: Dietary Fat, Sugar Consumption, and Cardiorespiratory Fitness in Patients With Heart Failure With Preserved Ejection Fraction
Source: PubMed Central journal article supplement — JACC Basic Transl Sci. 2017 Oct 30;2(5):513–25. doi: 10.1016/j.jacbts.2017.06.009 (PMC6058958; doi:10.1016/j.jacbts.2017.06.009), 2017-10-30
Supplement: mmc1.pdf [file mmc1.pdf]

**Supplemental Figure 1. Sugars consumption and cardiorespiratory fitness in HFpEF.** Sugars consumption in grams (Panel A) is associated with worse peak VO<sub>2</sub> in HFpEF. Similarly, percentage of total calories deriving from sugars was associated with worse peak VO<sub>2</sub> (Panel B). Peak VO<sub>2</sub>=peak oxygen consumption

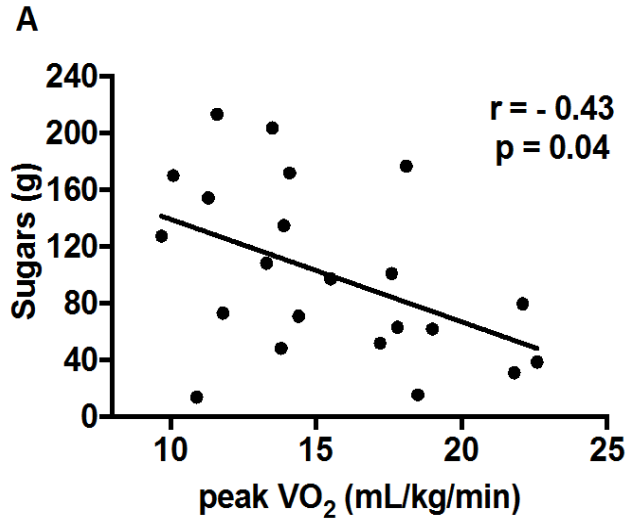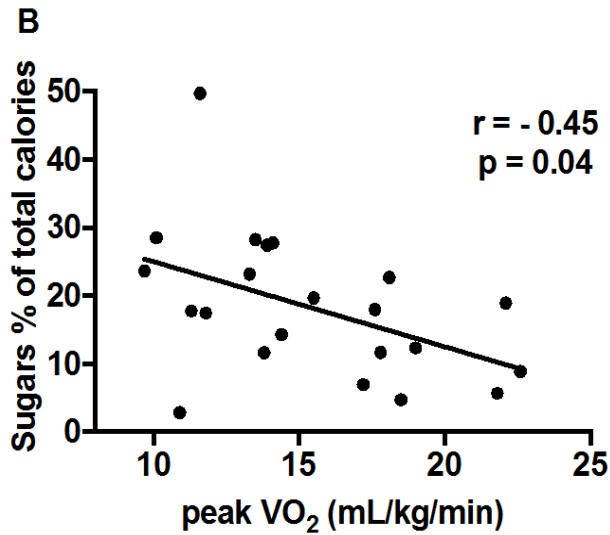

**Supplemental Figure 2. Effects of high-sugar low-saturated fat diet on cardiac function.** Eight-week cumulative food intake (Panel A) and body weight (Panel B) were higher in high-sugars and high-saturated fat diet (Western diet) compared to Standard diet and high-sugar diet. Isovolumetric relaxation time (IRT)(Panel C) and myocardial performance index(MPI)(Panel D) were significantly worse in Western diet or high-sugar diet compared to Standard diet. MPI was significantly worse in Western diet-fed mice compared to high-sugar diet-fed mice. After adjustments for caloric intake, the difference in body weight between groups were not anymore apparent (Panel E) and differences between Western diet and high-sugar diet disappeared (Panels F and G).

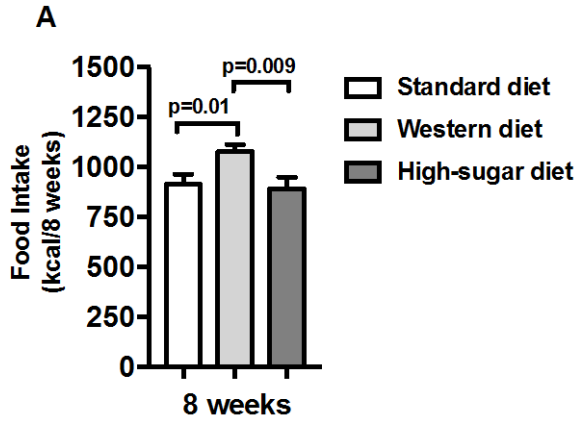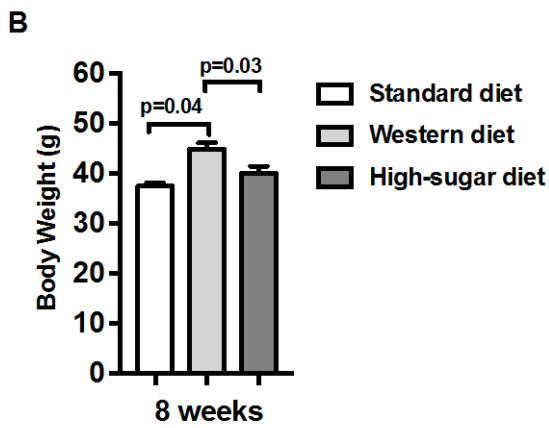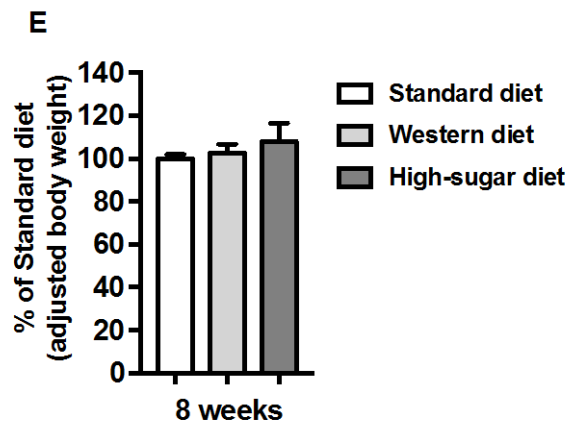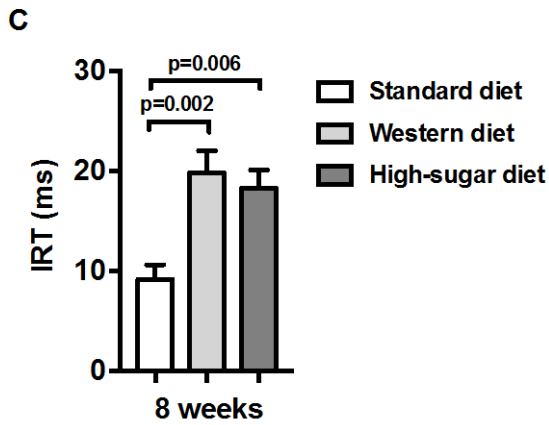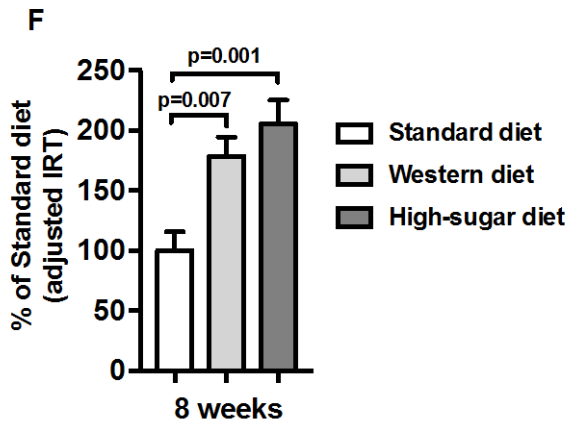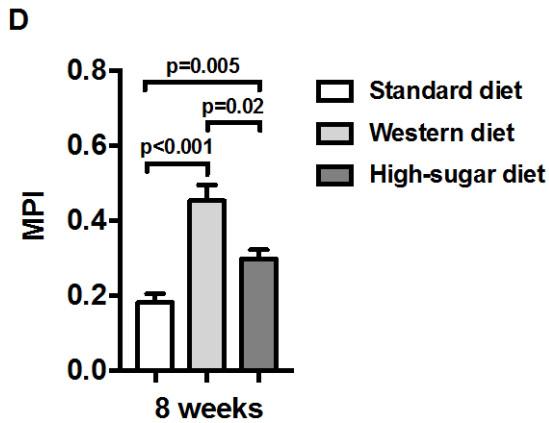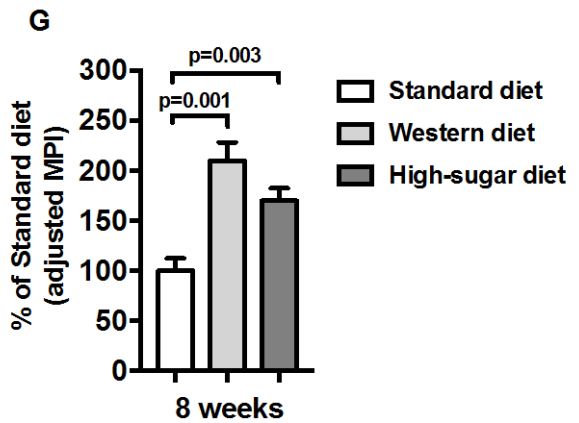

**Supplemental Table 1. Nutritional characteristics of experimental diets in the mouse**

| <b>Nutrients<br/>(% of total calories)</b>                  | <b>Western diet</b> | <b>High-sugar diet</b> | <b>Standard diet</b> |
|-------------------------------------------------------------|---------------------|------------------------|----------------------|
| <b>Proteins</b>                                             | 15.2                | 15.2                   | 25.0                 |
| <b>Total Fat</b>                                            | 42.0                | 42.0                   | 17.0                 |
| <b>Saturated Fatty Acids<br/>(% of total fatty acids)</b>   | 65                  | 15                     | 14                   |
| <b>Unsaturated Fatty Acids<br/>(% of total fatty acids)</b> | 35                  | 85                     | 86                   |
| <b>Total Carbohydrates</b>                                  | 42.7                | 42.8                   | 58                   |
| <b>Sugars</b>                                               | 30                  | 30                     | 0                    |
| <b>Cholesterol (% of weight)</b>                            | 0.2                 | 0.2                    | 0                    |
| <b>Energy density (kcal/g)</b>                              | 4.5                 | 4.5                    | 3.1                  |
